# Supplementary material
Source: PubMed Central journal article supplement (PMC3587324)
Supplement: supp_blood-2012-09-457531_blood-2012-09-457531-1.pdf [file supp_blood-2012-09-457531_blood-2012-09-457531-1.pdf]

## Supplementary Data

**Supplementary Table 1. Comparison of the phenotypic and functional profile of CD8<sup>+</sup> T cells from CLL patients and healthy controls.**

|                                                            | <b>Healthy</b>            | <b>CLL</b>                | <b>p value</b> |
|------------------------------------------------------------|---------------------------|---------------------------|----------------|
|                                                            | <b>Median/Mean(Range)</b> | <b>Median/Mean(Range)</b> |                |
| <b>% CD8<sup>+</sup>CD244<sup>+</sup></b>                  | 66.0% (21.8–85.9)         | 80.3% (33.7-97.3)         | 0.0014         |
| <b>Abs. Nos. CD8<sup>+</sup>CD244<sup>+</sup></b>          | 329 cells/μl (55.9-1150)  | 826 cells/μl (20-23110)   | 0.0002         |
| <b>% CD8<sup>+</sup>CD160<sup>+</sup></b>                  | 13.4% (2.0-33.4)          | 29.3% (8.5-81.2)          | 0.0002         |
| <b>Abs. Nos. CD8<sup>+</sup>CD160<sup>+</sup></b>          | 58.7 cells/μl (7.9-452)   | 295 cells/μl (7.6-13055)  | <0.0001        |
| <b>% CD8<sup>+</sup>PD1<sup>+</sup></b>                    | 15.9%(9.8-38.5)           | 24.1% (4.9-58.6)          | 0.04           |
| <b>Abs. Nos. CD8<sup>+</sup>PD1<sup>+</sup></b>            | 70.8 cells/μl (25.8-277)  | 210 cells/μl (8.8-6433)   | <0.0001        |
| <b>% CD8<sup>+</sup>CCR7<sup>-</sup></b>                   | 68.6% (26.1-88.9)         | 77.9% (34.9-96.3)         | 0.0043         |
| <b>Abs. Nos. CD8<sup>+</sup>CCR7<sup>-</sup></b>           | 348 cells/μl (79.8-1165)  | 884 cells/μl (19.5-24083) | <0.0001        |
| <b>% CD8<sup>+</sup>PD1<sup>+</sup>BLIMP1<sup>HI</sup></b> | 0.31%(0.11-1.33)          | 1.16%(0.36-3.9)           | <0.0001        |
| <b>% CD8<sup>+</sup>CD127<sup>+</sup></b>                  | 75.3% (40.8-96.8)         | 60.5% (21.9-92.8)         | 0.079          |
| <b>Proliferation Index</b>                                 | 1.58 (1.32-2.15)          | 1.24 (1.01-1.60)          | <0.0001        |
| <b>% CD8<sup>+</sup> Divided</b>                           | 53.8 (31.0-70.3)          | 39.6% (4.8-66.5)          | 0.024          |
| <b>% Specific lysis (30:1)</b>                             | 55.5% (44.0-60.0)         | 14.0% (9.0-19.0)          | <0.0001        |
| <b>% CD8<sup>+</sup>IFNγ<sup>+</sup></b>                   | 50.1% (20.8-81.1)         | 72.2% (43.2-97.6)         | <0.0001        |
| <b>% CD8<sup>+</sup>TNFα<sup>+</sup></b>                   | 55.9% (28.8-88.9)         | 69.5% (52.6-92.9)         | 0.033          |
| <b>% CD8<sup>+</sup>IL2<sup>+</sup></b>                    | 33.6% (18.5-62.5)         | 38.7% (14.3-78.6)         | 0.29           |
| <b>CD8<sup>+</sup>CCR7<sup>-</sup>TBET MFI</b>             | 4784 (1614-9252)          | 7416 (2272-13249)         | 0.0005         |

**Supplementary Table 2. Impact of CMV serostatus on the phenotypic and functional profile of CD8<sup>+</sup> T cells from CLL patients and healthy controls.**

|                                                            | <b>Healthy</b>            | <b>CLL</b>                | <b>p value</b> |
|------------------------------------------------------------|---------------------------|---------------------------|----------------|
|                                                            | <b>Median/Mean(Range)</b> | <b>Median/Mean(Range)</b> |                |
| <b>% CD8<sup>+</sup>CD244<sup>+</sup></b>                  |                           |                           |                |
| - CMV-                                                     | 41.0% (21.8-67.9)         | 68.8% (33.7-97.3)         | 0.0076         |
| - CMV+                                                     | 67.7% (29.2-85.9)         | 85.5% (61.3-94.5)         | 0.0051         |
| <b>% CD8<sup>+</sup>CD160<sup>+</sup></b>                  |                           |                           |                |
| - CMV-                                                     | 10.6% (1.98-13.4)         | 18.4% (8.5-81.2)          | 0.0041         |
| - CMV+                                                     | 16.1% (4.3-33.4)          | 30.9% (9.2-49.2)          | 0.0019         |
| <b>% CD8<sup>+</sup>PD1<sup>+</sup></b>                    |                           |                           |                |
| - CMV-                                                     | 17.0% (11.6-27.0)         | 33.8% (21.6-58.6)         | 0.0020         |
| - CMV+                                                     | 13.3% (9.8-38.5)          | 16.6% (4.9-46.7)          | 0.80           |
| <b>% CD8<sup>+</sup>CCR7<sup>-</sup></b>                   |                           |                           |                |
| - CMV-                                                     | 40.1% (34.9-74.4)         | 76.7% (34.9-95.9)         | 0.014          |
| - CMV+                                                     | 73.2% (26.1-88.9)         | 87.0% (61.0-96.3)         | 0.047          |
| <b>% CD8<sup>+</sup>IFN<math>\gamma</math><sup>+</sup></b> |                           |                           |                |
| - CMV-                                                     | 35.3% (20.8-59.1)         | 66.4% (43.2-97.6)         | 0.0012         |
| - CMV+                                                     | 53.2% (21.8-81.1)         | 82.7% (56.6-92.8)         | 0.0036         |
| <b>CD8<sup>+</sup>CCR7<sup>-</sup>TBET MFI</b>             |                           |                           |                |
| - CMV-                                                     | 3415 (1614-5542)          | 5710 (2272-8964)          | 0.0091         |
| - CMV+                                                     | 5032 (3399-9252)          | 9690 (4725-13249)         | 0.0003         |
| <b>Proliferation Index</b>                                 |                           |                           |                |
| - CMV-                                                     | 1.61 (1.32-1.99)          | 1.19 (1.01-1.60)          | 0.005          |
| - CMV+                                                     | 1.58 (1.38-2.15)          | 1.26 (1.07-1.57)          | 0.0008         |
| <b>% Specific lysis (30:1)</b>                             |                           |                           |                |
| - CMV-                                                     | 56.0% (48.0-60.0)         | 14.0% (12.0-16.0)         | 0.012          |
| - CMV+                                                     | 55.0% (44.0-59.0)         | 15.0% (9.0-16.0)          | 0.0014         |
| <b>% CD8<sup>+</sup>CD107a<sup>+</sup></b>                 |                           |                           |                |
| - CMV-                                                     | 2.9% (2.1-4.7)            | 15.7% (4.9-35.4)          | 0.0007         |
| - CMV+                                                     | 4.2% (2.3-12.2)           | 9.8% (4.3-37.8)           | 0.0026         |

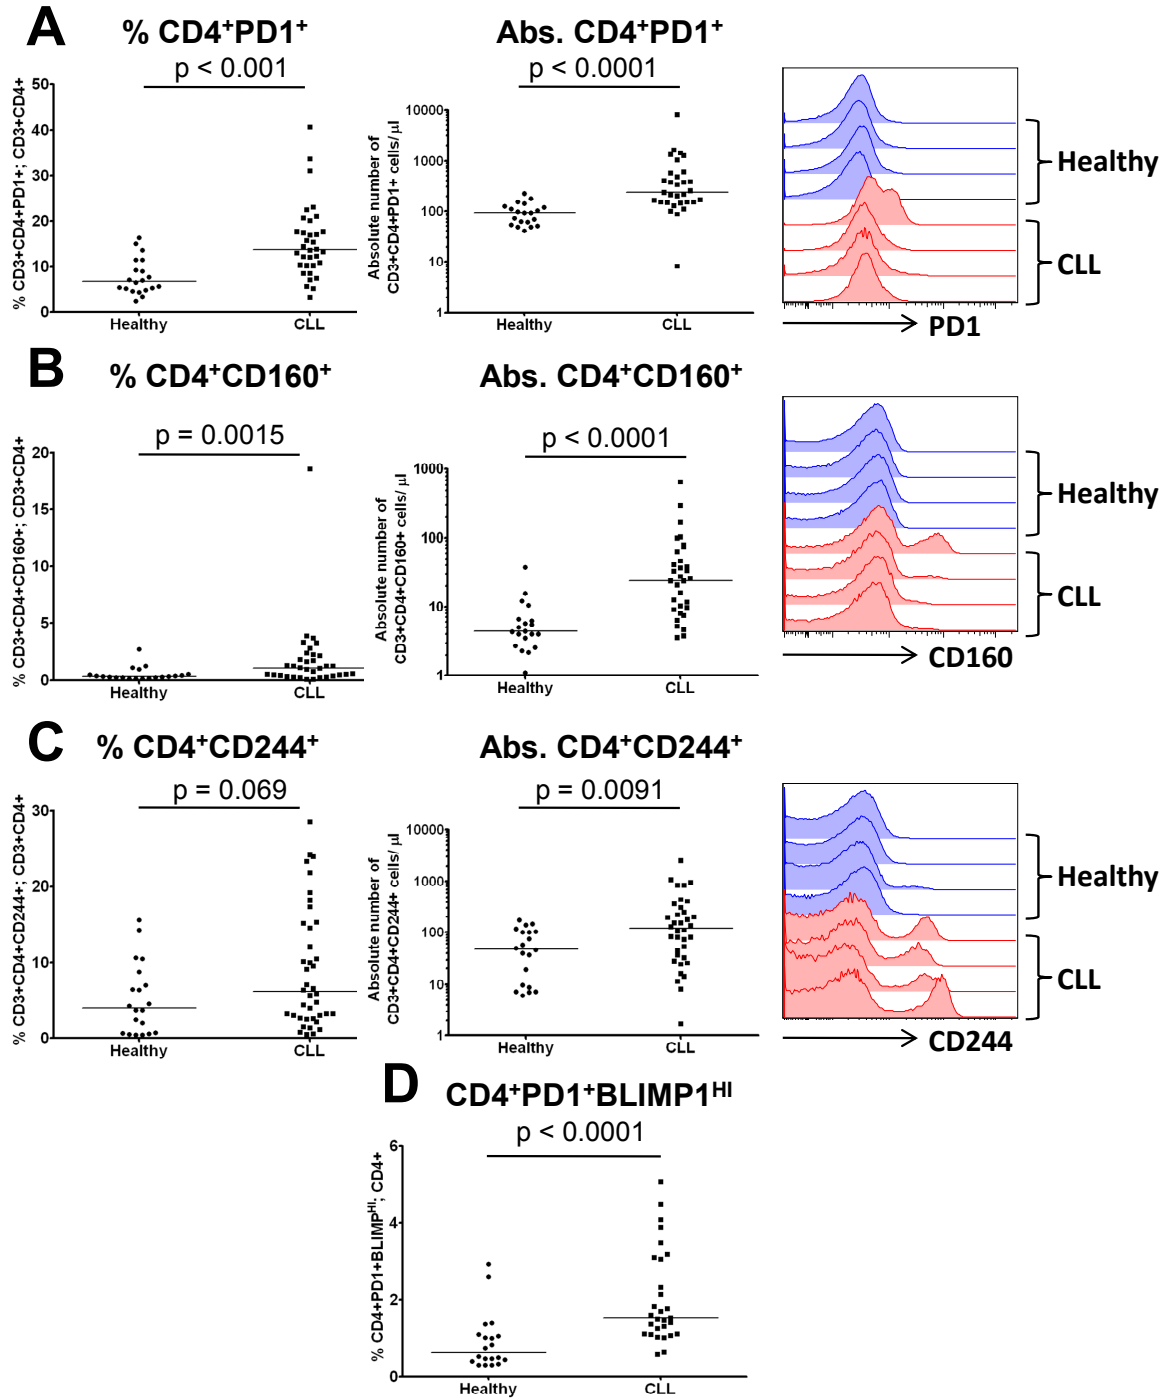

**Supplementary Figure 1. Expression of PD1, CD160 and CD244 on CD4<sup>+</sup> T cells from patients with CLL.** The expression PD1, CD160, and CD244 on CD4<sup>+</sup> T cells from patients with CLL and healthy age-matched controls was measured by flow cytometry. There was a significant increase in numbers of PD1<sup>+</sup> (A) and CD160<sup>+</sup> (B) and CD244<sup>+</sup> (C) CD3<sup>+</sup>CD4<sup>+</sup> T cells in CLL patients compared to healthy controls. (D) CD3<sup>+</sup>CD4<sup>+</sup>PD1<sup>+</sup>BLIMP1<sup>HI</sup> cells are expanded in CLL patients.

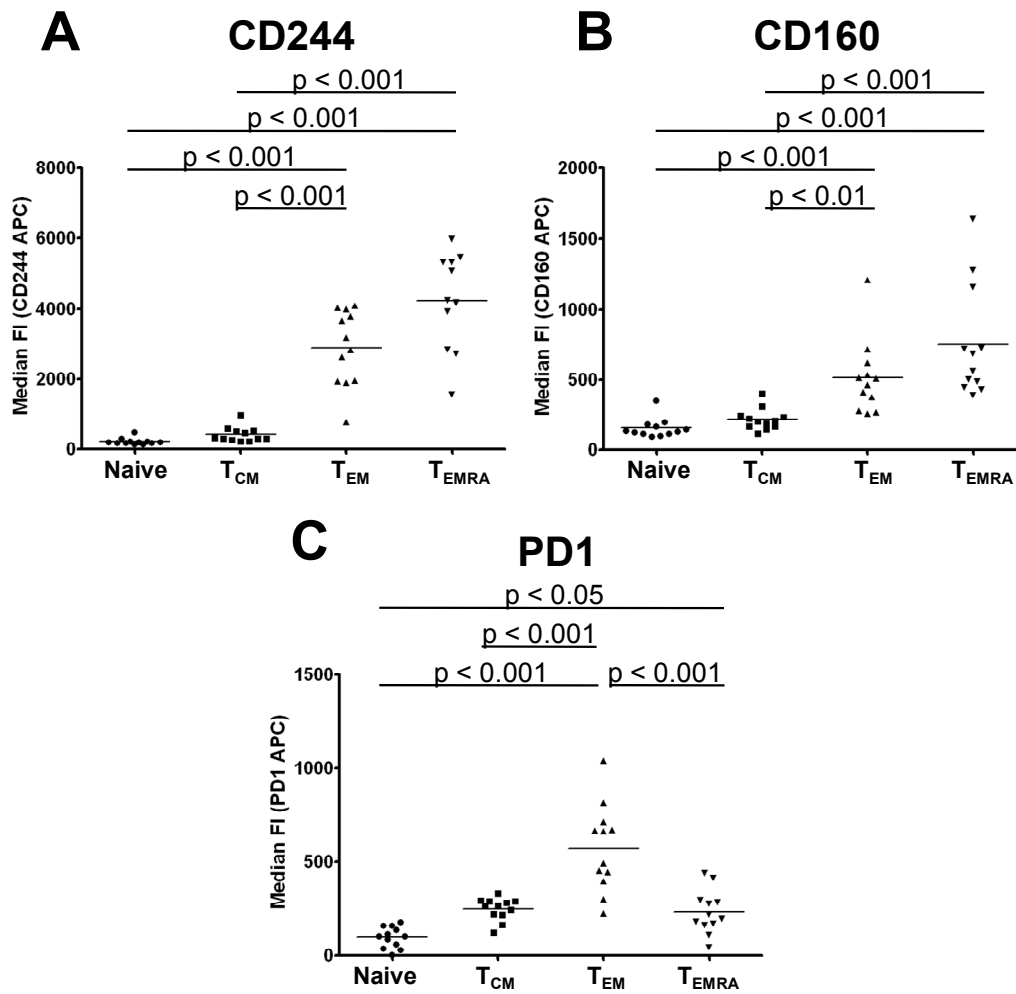

**Supplementary Figure 2. CD244, CD160, and PD1 are preferentially expressed on healthy CD3<sup>+</sup>CD8<sup>+</sup>CCR7<sup>-</sup> effector T cells.** The expression of CD244, CD160 and PD1 on CD8<sup>+</sup> T cells from healthy controls was assessed. Comparable to CD8<sup>+</sup> T cells from CLL patients, expression of CD244 (A) and CD160 (B) was increased on CCR7<sup>-</sup>CD45RA<sup>-</sup> T<sub>EM</sub> cells, and was highest on CCR7<sup>-</sup>CD45RA<sup>+</sup> T<sub>EMRA</sub> cells. (C) Expression of PD1 was highest on CCR7<sup>-</sup>CD45RA<sup>-</sup> T<sub>EM</sub> cells.

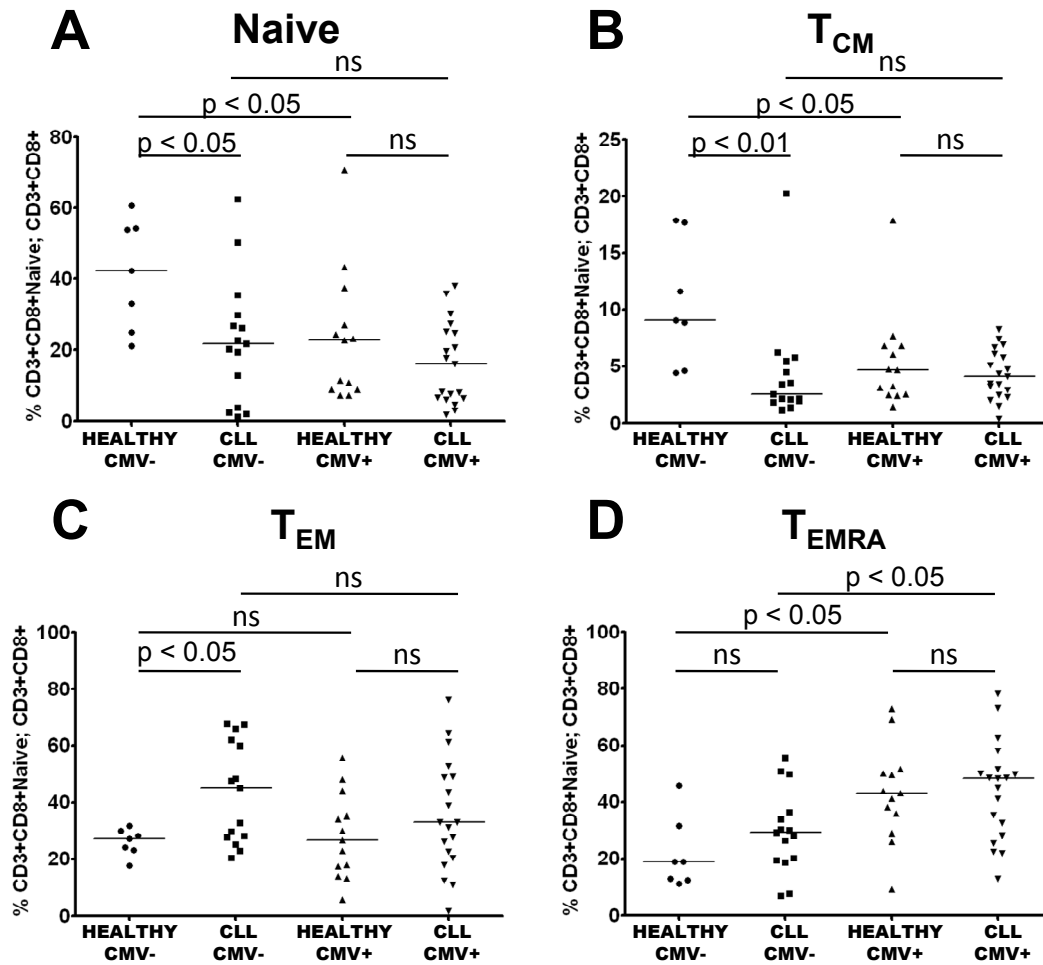

**Supplementary Figure 3. B-CLL skews the CD3<sup>+</sup>CD8<sup>+</sup> T cell repertoire towards a CCR7<sup>-</sup>CD45RA<sup>-</sup> effector memory phenotype, whereas the presence of CMV leads to an expansion of CCR7<sup>-</sup>CD45RA<sup>+</sup> T<sub>EMRA</sub> subtype.** B-CLL patients and healthy CMV+ individuals had a reduction in CCR7<sup>+</sup>CD45RA<sup>+</sup> naive (A) and CCR7<sup>+</sup>CD45RA<sup>-</sup> central memory T-cell (B) numbers when compared with healthy CMV- controls. (C) CCR7<sup>-</sup>CD45RA<sup>-</sup> effector memory T cells were only significantly expanded when comparing CMV- patients and controls. (D) In contrast CCR7<sup>-</sup>CD45RA<sup>+</sup> T<sub>EMRA</sub> cells were only significantly expanded in CMV+ patients and controls.

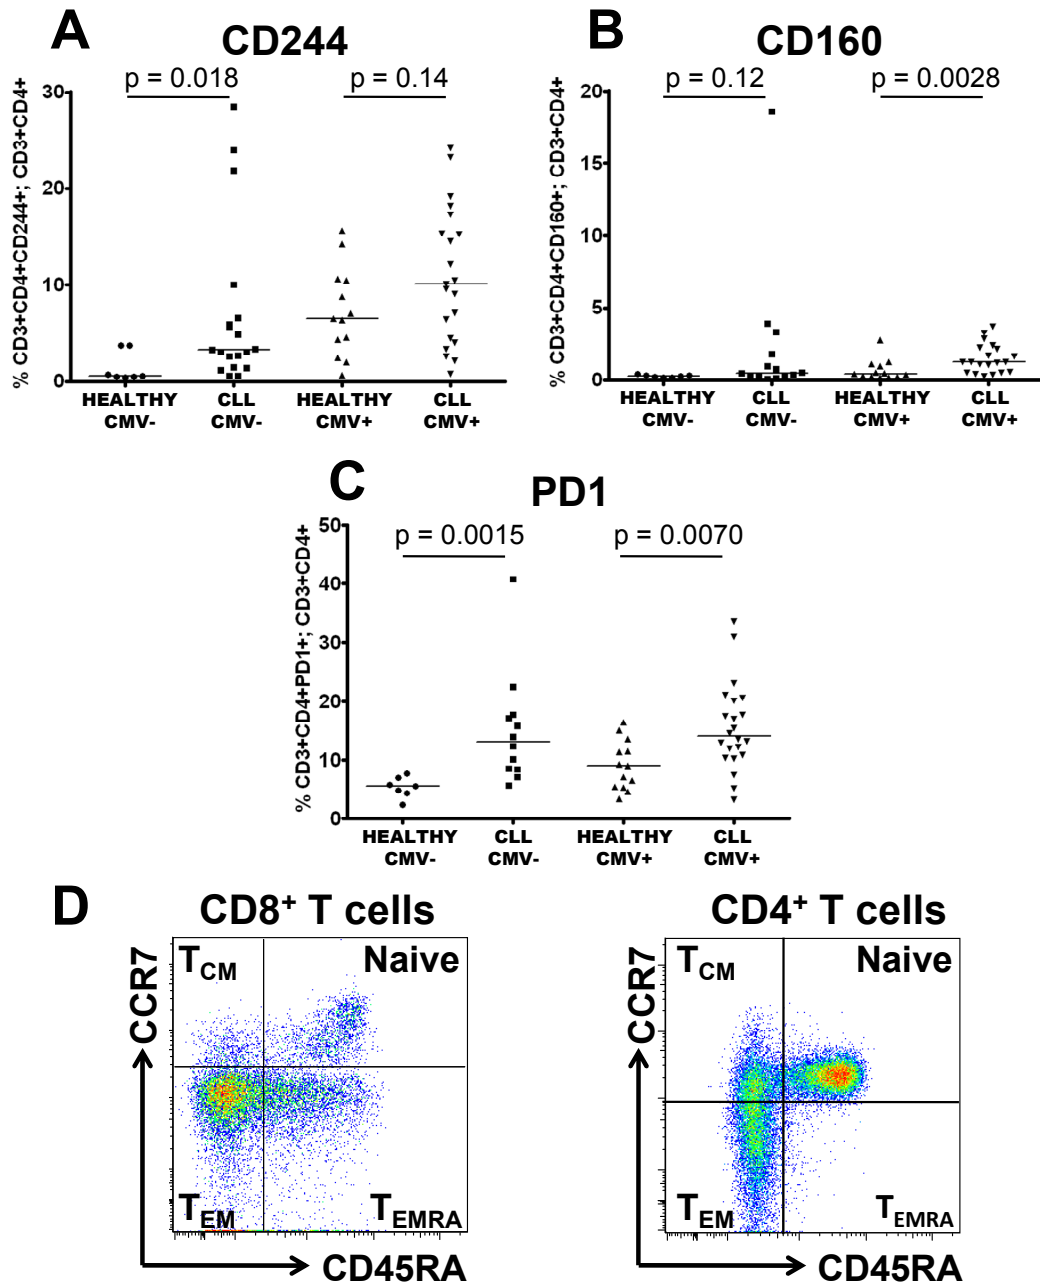

**Supplementary Figure 4. Increased expression of PD1, CD160 and CD244 on CD4<sup>+</sup> T cells from patients with CLL.** The proportion of CD4<sup>+</sup> T cells expressing PD1, CD160, and CD244 were measured by flow cytometry in patients with CLL and healthy controls matched for age and CMV serostatus. (A) There was a significant increase in the expression of CD244 when comparing CMV<sup>-</sup> patients and controls. (B) There was a significant increase in the expression of CD160 when comparing CMV<sup>+</sup> patients and controls. (C) In contrast, expression of PD1 was significantly increased when comparing both groups. (D) An equivalent to the CD8<sup>+</sup> T<sub>EMRA</sub> subset is not seen in the CD4<sup>+</sup> compartment.
